# Supplementary material for: In situ immobilization of Fe/Fe3C/Fe2O3 hollow hetero-nanoparticles onto nitrogen-doped carbon nanotubes towards high-efficiency electrocatalytic oxygen reduction
Source: Royal Society of Chemistry journal article supplement (doi:10.1039/d1nr00078k), 2021-01-01
Supplement: d1nr00078k1.pdf [file d1nr00078k1.pdf]

***In-situ* immobilization of Fe/Fe<sub>3</sub>C/Fe<sub>2</sub>O<sub>3</sub> hollow hetero-nanoparticles  
onto nitrogen-doped carbon nanotubes towards high-efficiency  
electrocatalytic oxygen reduction**

Binbin Zhang,<sup>a</sup> Tongfei Li,<sup>a</sup> Longzhen Huang,<sup>a</sup> Yiping Ren,<sup>a</sup> Dongmei Sun,<sup>a</sup> Huan Pang,<sup>b</sup>  
Jun Yang,<sup>c,d</sup> Lin Xu,<sup>\*a</sup> and Yawen Tang<sup>\*a</sup>

a Jiangsu Key Laboratory of New Power Batteries, School of Chemistry and Materials Science

Nanjing Normal University

Nanjing 210023, China

E-mail: xulin001@njnu.edu.cn, njuxulin@gmail.com (L. Xu); tangyawen@njnu.edu.cn (Y.

Tang)

b School of Chemistry and Chemical Engineering

Yangzhou University

Yangzhou 225009, China

c Nanjing IPE Institute of Green Manufacturing Industry

Nanjing 211100, China

d State Key Laboratory of Multiphase Complex Systems

Institute of Process Engineering, Chinese Academy of Sciences

Beijing 100190, China

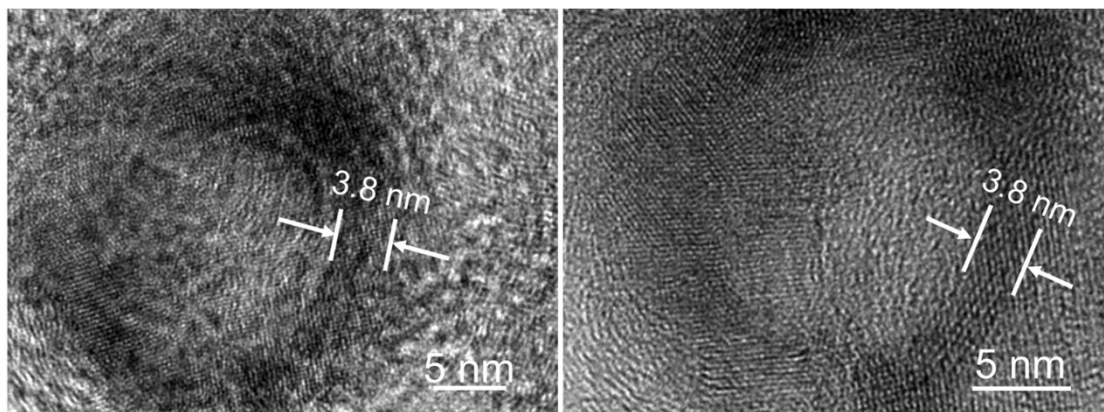

Figure S1. TEM images of Fe/Fe<sub>3</sub>C/Fe<sub>2</sub>O<sub>3</sub> hollow nanoparticles.

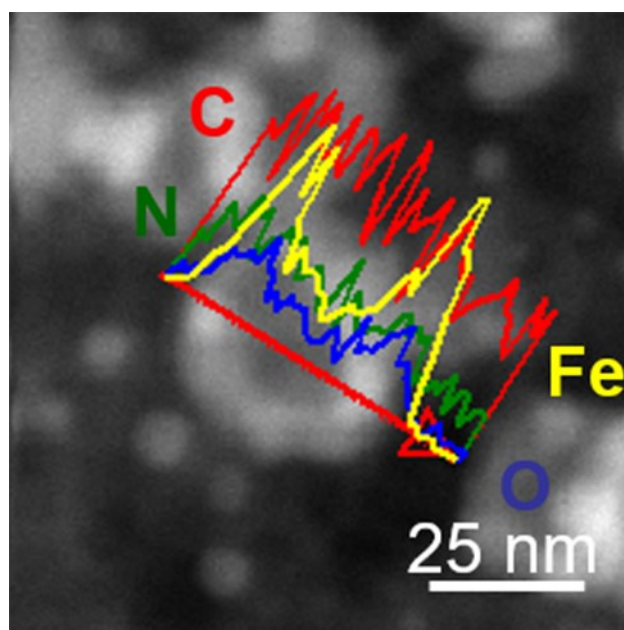

Figure S2. HAADF-STEM image and EDX line scanning profiles of Fe/Fe<sub>3</sub>C/Fe<sub>2</sub>O<sub>3</sub> hollow nanoparticles.

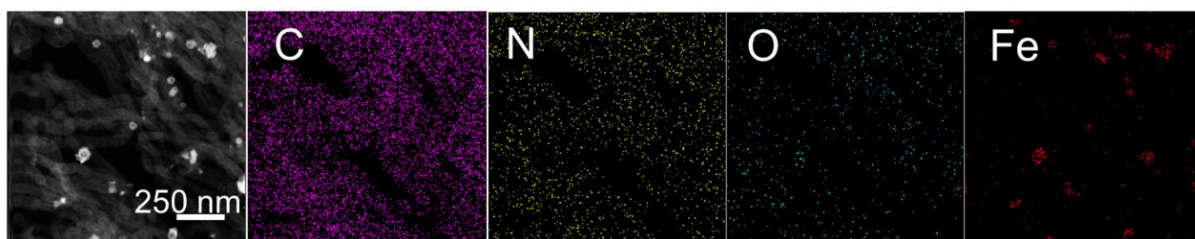

Figure S3. HAADF-STEM image and elemental mapping images of the formed Fe/Fe<sub>3</sub>C/Fe<sub>2</sub>O<sub>3</sub>@N-CNTs.

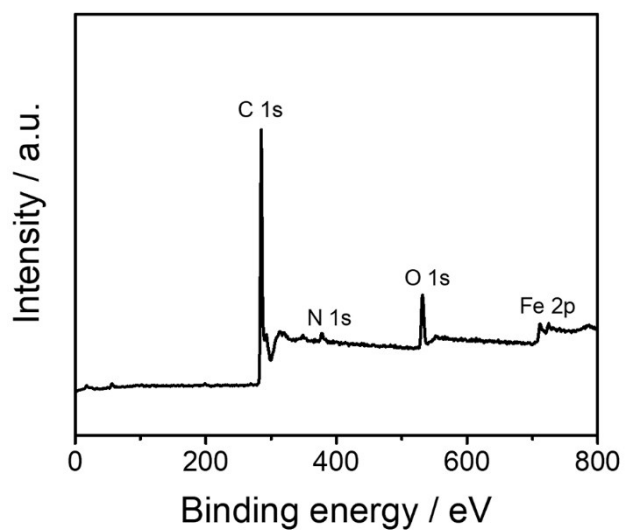

Figure S4. XPS survey spectrum of Fe/Fe<sub>3</sub>C/Fe<sub>2</sub>O<sub>3</sub>@N-CNTs.

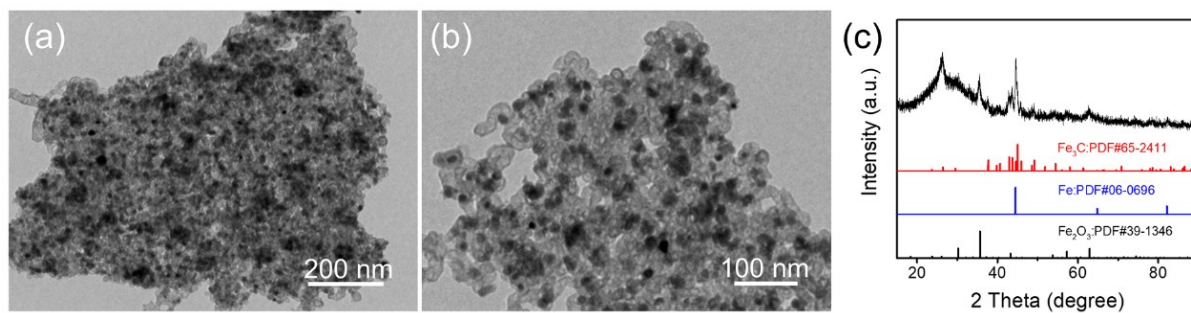

Figure S5. Morphological and structural characterization of Fe/Fe<sub>3</sub>C/Fe<sub>2</sub>O<sub>3</sub>@N-CNTs-800. (a)-(b)

TEM images, and (c) XRD pattern.

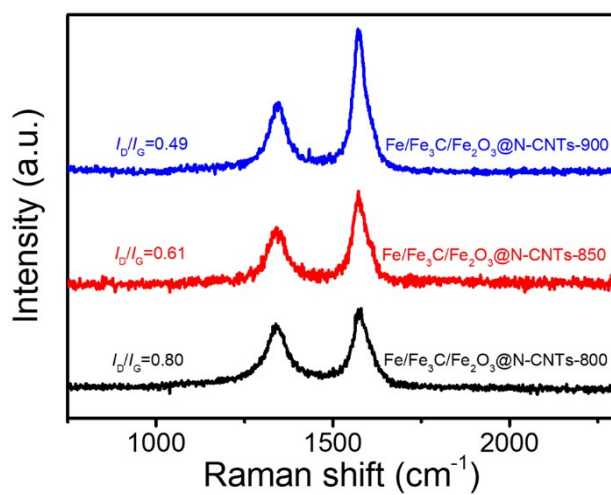

Figure S6. Raman spectra of the Fe/Fe<sub>3</sub>C/Fe<sub>2</sub>O<sub>3</sub>@N-CNT family samples obtained at different pyrolysis temperatures.

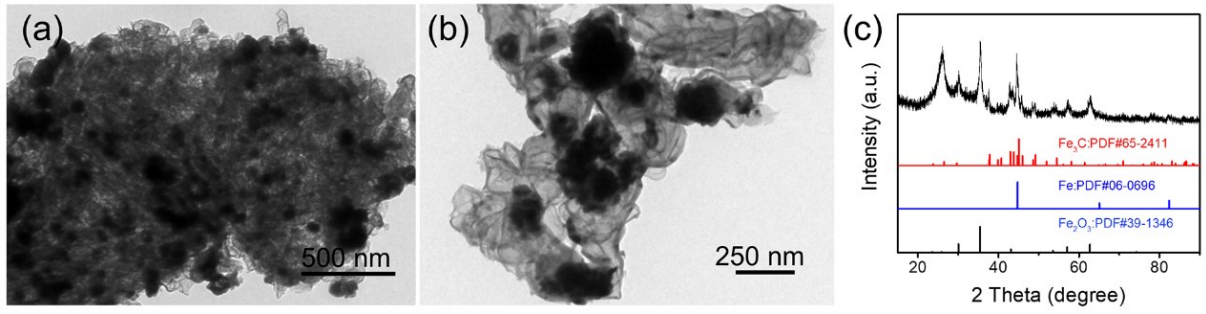

Figure S7. Morphological and structural characterization of Fe/Fe<sub>3</sub>C/Fe<sub>2</sub>O<sub>3</sub>@N-CNTs-900. (a)-(b)

TEM images, and (c) XRD pattern.

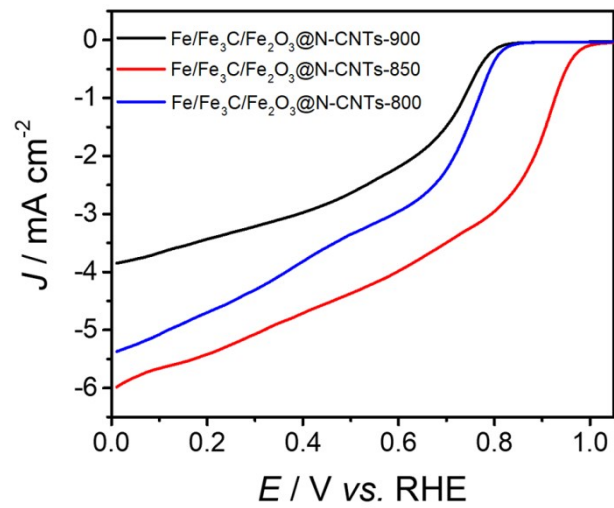

Figure S8. LSV curves of the Fe/Fe<sub>3</sub>C/Fe<sub>2</sub>O<sub>3</sub>@N-CNT family samples obtained at different pyrolysis temperatures.

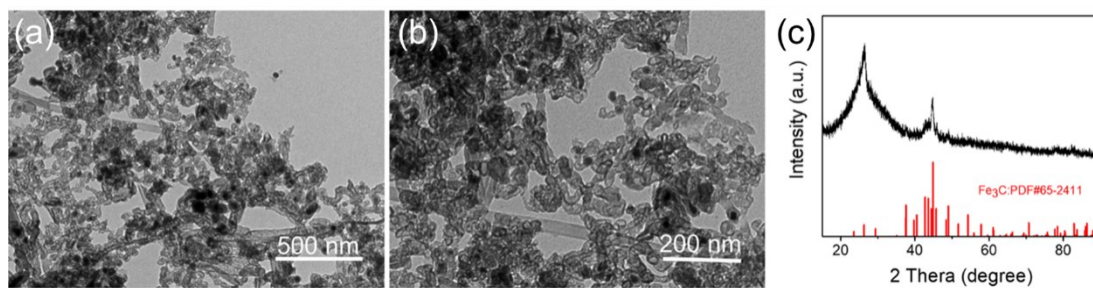

Figure S9. Morphological and structural characterization of the Fe<sub>3</sub>C@N-CNTs. (a)-(b) TEM images, and (c) XRD pattern.

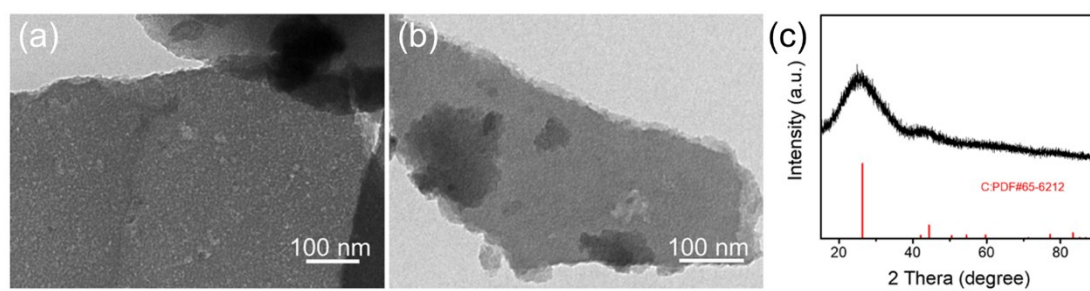

Figure S10. Morphological and structural characterization of the N-CNSs. (a)-(b) TEM images, and (c) XRD pattern.

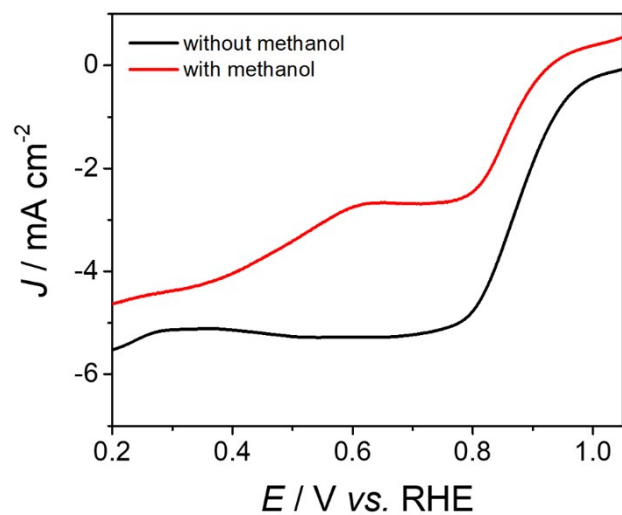

Figure S11. LSV curves of commercial Pt/C catalyst in an O<sub>2</sub>-saturated 0.1 M KOH with and without methanol, respectively.

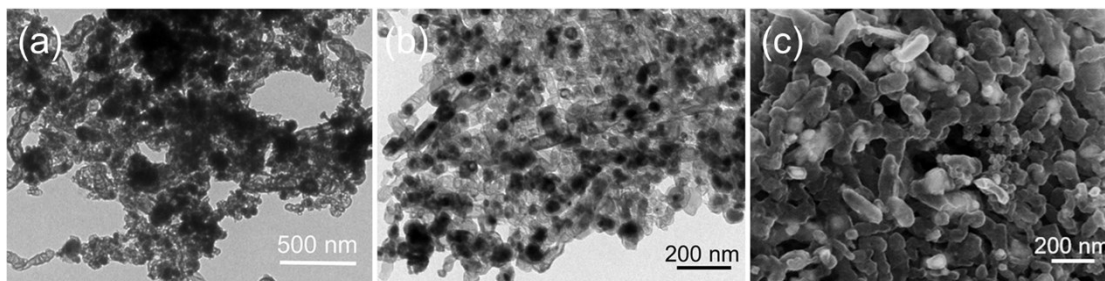

Figure S12. Morphological characterization of Fe/Fe<sub>3</sub>C/Fe<sub>2</sub>O<sub>3</sub>@N-CNTs after the stability test.

(a)-(b) TEM images, and (c) SEM image.



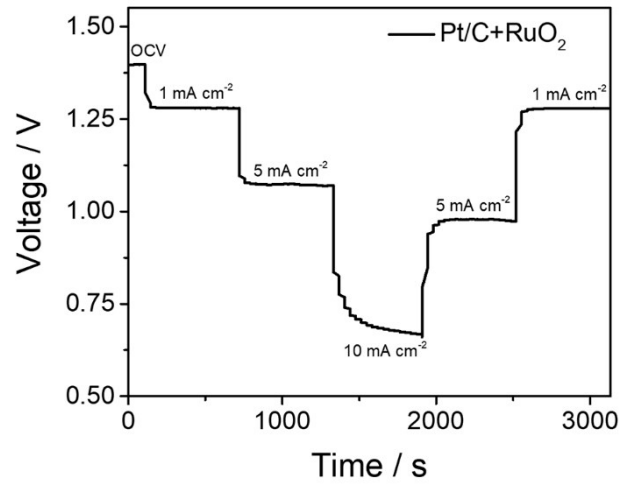

Figure S13. The rate performance of the Pt/C+RuO<sub>2</sub>-equipped ZAB.



**Table S1.** Comparison of the ORR performance of the synthesized Fe/Fe<sub>3</sub>C/Fe<sub>2</sub>O<sub>3</sub>@N-CNTs with previously reported Fe-based ORR catalysts in alkaline medium.

| Electrocatalysts                                            | $E_{\text{onset}}$<br>(V vs. RHE) | $E_{1/2}$<br>(V vs. RHE) | Ref.                                                 |
|-------------------------------------------------------------|-----------------------------------|--------------------------|------------------------------------------------------|
| Fe/Fe <sub>3</sub> C/Fe <sub>2</sub> O <sub>3</sub> @N-CNTs | 0.985                             | 0.890                    | This work                                            |
| Fe@NMC-1                                                    | 1.01                              | 0.88                     | <i>ACS Appl. Mater. Interfaces</i> , 2019, 11, 25976 |
| FePC-NH <sub>2</sub> /HCB800                                | 0.98                              | 0.84                     | <i>J. Energy Chem.</i> , 2019, 28, 73                |
| Fe@N-C NT/NSs                                               | 1.0                               | 0.82                     | <i>Nanoscale</i> , 2020, 12, 13987                   |
| Fe@C-NG/NCNTs                                               | 0.93                              | 0.84                     | <i>J. Mater. Chem. A</i> , 2018, 6, 516              |
| Fe/Fe <sub>3</sub> C@N-C-NaCl                               | 0.970                             | 0.869                    | <i>J. Mater. Chem. A</i> , 2016, 4, 7781             |
| FeCNR-750                                                   | 0.96                              | 0.83                     | <i>Inorg. Chem. Front.</i> , 2020, 7, 889            |
| Fe <sub>7</sub> C <sub>3</sub> @FeNC                        | 0.96                              | 0.83                     | <i>ACS Sustainable Chem. Eng.</i> , 2019, 7, 13576   |
| FeNPC                                                       | 1.03                              | 0.88                     | <i>J. Mater. Chem. A</i> , 2019, 7, 14732            |
| Fe-N-C/MXene                                                | 0.92                              | 0.84                     | <i>ACS Nano</i> , 2020, 14, 2436                     |
| Fe-CZIF-800-10                                              | 0.982                             | 0.830                    | <i>Nanoscale</i> , 2018, 10, 9252                    |
| Fe-N-OCNT                                                   | 0.96                              | 0.86                     | <i>New J. Chem.</i> , 2020, 44, 10729                |
| Fe/Fe <sub>3</sub> C@N-C-1                                  | 0.936                             | 0.804                    | <i>J. Colloid Interface Sci.</i> , 2018, 524, 93     |
| FePc@N,P-DC                                                 | 0.979                             | 0.903                    | <i>Appl. Catal. B: Environ.</i> , 2020, 260, 118198  |
| Fe/Fe <sub>3</sub> C@Fe-N <sub>x</sub> -C                   | 1.0                               | 0.9                      | <i>J. Energy Chem.</i> , 2021, 56, 72                |
| Fe <sub>3</sub> N@NC                                        | 0.995                             | 0.849                    | <i>Carbon</i> , 2019, 153, 364                       |

**Table S2.** Comparison of power density of Fe/Fe<sub>3</sub>C/Fe<sub>2</sub>O<sub>3</sub>@N-CNTs with other previously reported Fe-based catalysts.

| Catalysts                                                   | Power Density (mW cm <sup>-2</sup> ) | Electrolyte                           | Ref.                                                |
|-------------------------------------------------------------|--------------------------------------|---------------------------------------|-----------------------------------------------------|
| Fe/Fe <sub>3</sub> C/Fe <sub>2</sub> O <sub>3</sub> @N-CNTs | 126.7                                | 6.0 M KOH + 0.2 M ZnCl <sub>2</sub>   | This work                                           |
| Pt/C+RuO <sub>2</sub>                                       | 102.6                                | 6.0 M KOH + 0.2 M ZnCl <sub>2</sub>   | Commercial catalysts                                |
| Ni-Fe-MoN NTs                                               | 118                                  | 6 M KOH                               | <i>Adv. Energy Mater.</i> , 2018, 8, 1802327        |
| Fe-Co <sub>4</sub> N@N-C                                    | 105                                  | 6.0 M KOH + 0.2 M Zn(Ac) <sub>2</sub> | <i>Appl. Catal. B: Environ.</i> , 2019, 256, 117893 |
| u-Fe <sub>7</sub> C <sub>3</sub> @NC                        | 105.3                                | 7.0 M KOH + 0.2 M ZnCl <sub>2</sub>   | <i>Chem. Commun.</i> , 2019, 55, 5651               |
| Fe/Co-N/S-Cs                                                | 102.63                               | 6.0 M KOH + 0.2 M Zn(Ac) <sub>2</sub> | <i>Appl. Catal. B: Environ.</i> , 2019, 241, 95     |
| Fe <sub>0.5</sub> Ni <sub>0.5</sub> @N-GR                   | 85                                   | 6.0 M KOH + 0.2 M Zn(Ac) <sub>2</sub> | <i>Adv. Funct. Mater.</i> , 2018, 28, 1706928       |
| Fe-N-C                                                      | 100                                  | 6 M KOH                               | <i>Carbon</i> , 2019, 150, 475                      |
| Fe <sub>2</sub> P/NPC                                       | 111.6                                | 6.0 M KOH + 0.2 M Zn(Ac) <sub>2</sub> | <i>Carbon</i> , 2020, 158, 885                      |
| FeO <sub>x</sub> @N-PHCS                                    | 93.6                                 | 6.0 M KOH + 0.2 M Zn(Ac) <sub>2</sub> | <i>J. Energy Chem.</i> , 2020, 49, 14               |
| Co <sub>2</sub> FeO <sub>4</sub> /NCNTs                     | 90.68                                | 6.0 M KOH + 0.2 M Zn(Ac) <sub>2</sub> | <i>Angew. Chem. Int. Ed.</i> , 2019, 58, 13291      |
| AlFeCoNiCr                                                  | 125                                  | 6.0 M KOH + 0.2 M Zn(Ac) <sub>2</sub> | <i>Appl. Catal. B: Environ.</i> , 2020, 268, 118431 |
| FC-C@NC                                                     | 118.2                                | 6.0 M KOH + 0.2 M Zn(Ac) <sub>2</sub> | <i>Carbon Energy</i> , 2020, 2, 283                 |
| A-FeNC                                                      | 102.2                                | 6.0 M KOH + 0.2 M Zn(Ac) <sub>2</sub> | <i>Phys. Chem. Chem. Phys.</i> , 2020, 22, 7218     |
| Fe <sub>2</sub> Ni@NC                                       | 126                                  | 6.0 M KOH + 0.2 M Zn(Ac) <sub>2</sub> | <i>Adv. Energy Mater.</i> , 2019, 8, 1903003a       |
